# Supplementary material for: Identification of Flavanone 3-Hydroxylase Gene Family in Strawberry and Expression Analysis of Fruit at Different Coloring Stages
Source: MDPI journal article supplement (doi:10.3390/ijms242316807), 2023-11-27
Supplement: s1 [file s1]

**Supplementary Table S1.** The physicochemical properties of *FvF3H* in strawberry

| Gene name      | Accession number       | Amino acid numbers(aa) | Molecular Weight | Theoretical pI | Instability Index | Aliphatic Index | Grand Average of Hydropathicity |
|----------------|------------------------|------------------------|------------------|----------------|-------------------|-----------------|---------------------------------|
| <i>FvF3H1</i>  | <i>FvH4_1g00520.t1</i> | 311                    | 35156.51         | 5.58           | 29.38             | 77.11           | -0.421                          |
| <i>FvF3H2</i>  | <i>FvH4_1g02111.t1</i> | 359                    | 40328.1          | 5.97           | 43.24             | 87.33           | -0.324                          |
| <i>FvF3H3</i>  | <i>FvH4_1g02112.t1</i> | 339                    | 38426            | 5.37           | 43.18             | 87.61           | -0.291                          |
| <i>FvF3H4</i>  | <i>FvH4_1g02120.t1</i> | 339                    | 38701.36         | 5.24           | 42.98             | 91.36           | -0.345                          |
| <i>FvF3H5</i>  | <i>FvH4_1g02121.t1</i> | 354                    | 40771.94         | 5.33           | 49.93             | 86.16           | -0.391                          |
| <i>FvF3H6</i>  | <i>FvH4_1g02150.t1</i> | 355                    | 40623.73         | 4.83           | 48.28             | 94.39           | -0.275                          |
| <i>FvF3H7</i>  | <i>FvH4_1g02151.t1</i> | 354                    | 40680.58         | 4.93           | 48.38             | 91.69           | -0.317                          |
| <i>FvF3H8</i>  | <i>FvH4_1g02152.t1</i> | 354                    | 40680.58         | 4.78           | 44.55             | 90.79           | -0.259                          |
| <i>FvF3H9</i>  | <i>FvH4_1g02160.t1</i> | 265                    | 31220.56         | 4.95           | 51.17             | 75.02           | -0.513                          |
| <i>FvF3H10</i> | <i>FvH4_1g04200.t1</i> | 355                    | 39947.51         | 6.19           | 39.02             | 85.1            | -0.253                          |
| <i>FvF3H11</i> | <i>FvH4_1g05410.t1</i> | 372                    | 41691.52         | 6.1            | 37.12             | 86.24           | -0.289                          |
| <i>FvF3H12</i> | <i>FvH4_1g06010.t4</i> | 281                    | 32158.62         | 5.49           | 38.42             | 82.56           | -0.443                          |
| <i>FvF3H13</i> | <i>FvH4_1g07181.t1</i> | 261                    | 29506.24         | 5.29           | 37.02             | 76.13           | -0.556                          |
| <i>FvF3H14</i> | <i>FvH4_1g07190.t1</i> | 307                    | 35042.92         | 5.61           | 33.66             | 75.31           | -0.535                          |
| <i>FvF3H15</i> | <i>FvH4_1g09830.t1</i> | 297                    | 33103.08         | 5.31           | 38.78             | 93.84           | -0.128                          |
| <i>FvF3H16</i> | <i>FvH4_1g11810.t1</i> | 364                    | 41080.8          | 5.52           | 41.11             | 80.88           | -0.476                          |
| <i>FvF3H17</i> | <i>FvH4_1g16460.t3</i> | 239                    | 26766.56         | 5.18           | 20.15             | 78.28           | -0.307                          |
| <i>FvF3H18</i> | <i>FvH4_1g26760.t1</i> | 345                    | 37962.26         | 5.93           | 47.89             | 83.36           | -0.237                          |
| <i>FvF3H19</i> | <i>FvH4_2g03190.t1</i> | 239                    | 26385.11         | 4.93           | 42.11             | 94.64           | -0.226                          |
| <i>FvF3H20</i> | <i>FvH4_2g03200.t1</i> | 608                    | 67909.56         | 5.15           | 40.97             | 92.83           | -0.208                          |

|                |                        |     |          |      |       |       |        |
|----------------|------------------------|-----|----------|------|-------|-------|--------|
| <i>FvF3H21</i> | <i>FvH4_2g03210.t1</i> | 605 | 68294.08 | 5.22 | 38.91 | 92.64 | -0.238 |
| <i>FvF3H22</i> | <i>FvH4_2g03220.t1</i> | 187 | 20650.66 | 5.91 | 35.96 | 90.64 | -0.26  |
| <i>FvF3H23</i> | <i>FvH4_2g07071.t1</i> | 326 | 37682.73 | 5.76 | 34.68 | 77.73 | -0.695 |
| <i>FvF3H24</i> | <i>FvH4_2g07080.t2</i> | 351 | 40619.94 | 5.68 | 39.69 | 75.21 | -0.65  |
| <i>FvF3H25</i> | <i>FvH4_2g07081.t1</i> | 353 | 40681.17 | 5.33 | 38.28 | 80    | -0.594 |
| <i>FvF3H26</i> | <i>FvH4_2g07082.t1</i> | 351 | 40909.63 | 5.7  | 32.52 | 81.57 | -0.504 |
| <i>FvF3H27</i> | <i>FvH4_2g15310.t1</i> | 348 | 39232.33 | 5.44 | 48.8  | 81.15 | -0.348 |
| <i>FvF3H28</i> | <i>FvH4_2g15312.t1</i> | 151 | 17122.77 | 9.65 | 41.77 | 75.5  | -0.481 |
| <i>FvF3H29</i> | <i>FvH4_2g21630.t1</i> | 344 | 39115.7  | 5.77 | 33.81 | 86.57 | -0.289 |
| <i>FvF3H30</i> | <i>FvH4_2g21690.t3</i> | 342 | 38646.97 | 5.57 | 42.69 | 84.55 | -0.324 |
| <i>FvF3H31</i> | <i>FvH4_2g21772.t1</i> | 349 | 39665.59 | 5.58 | 41.24 | 99.63 | -0.133 |
| <i>FvF3H32</i> | <i>FvH4_2g21773.t1</i> | 337 | 38199.71 | 5.47 | 42.31 | 99.14 | -0.158 |
| <i>FvF3H33</i> | <i>FvH4_2g21774.t1</i> | 342 | 38275.81 | 6    | 45.18 | 89.74 | -0.278 |
| <i>FvF3H34</i> | <i>FvH4_2g21830.t1</i> | 361 | 40802.4  | 5.12 | 51.81 | 86.3  | -0.34  |
| <i>FvF3H35</i> | <i>FvH4_2g21870.t1</i> | 305 | 34043.06 | 5.17 | 42.28 | 76.36 | -0.452 |
| <i>FvF3H36</i> | <i>FvH4_2g21890.t1</i> | 365 | 41210.87 | 6.51 | 30.86 | 88.38 | -0.354 |
| <i>FvF3H37</i> | <i>FvH4_3g21910.t1</i> | 329 | 37755.26 | 6.64 | 43.42 | 82.61 | -0.316 |
| <i>FvF3H38</i> | <i>FvH4_2g26440.t1</i> | 335 | 38227.56 | 5.41 | 38.33 | 84.36 | -0.529 |
| <i>FvF3H39</i> | <i>FvH4_2g26480.t1</i> | 289 | 32741.61 | 5.17 | 50.3  | 90.35 | -0.329 |
| <i>FvF3H40</i> | <i>FvH4_2g27140.t1</i> | 342 | 38594.17 | 5.55 | 33.99 | 85.79 | -0.205 |
| <i>FvF3H41</i> | <i>FvH4_2g29950.t1</i> | 318 | 36117.15 | 5.42 | 39.43 | 79.12 | -0.383 |
| <i>FvF3H42</i> | <i>FvH4_2g29991.t1</i> | 326 | 37202.67 | 4.95 | 45.22 | 79.17 | -0.256 |
| <i>FvF3H43</i> | <i>FvH4_2g30010.t1</i> | 336 | 37704.27 | 6.79 | 36.84 | 90.77 | -0.212 |
| <i>FvF3H44</i> | <i>FvH4_2g30020.t1</i> | 341 | 38444    | 5.47 | 36.9  | 92.61 | -0.167 |
| <i>FvF3H45</i> | <i>FvH4_2g30021.t1</i> | 341 | 37915.37 | 5.21 | 36.32 | 92.61 | -0.123 |
| <i>FvF3H46</i> | <i>FvH4_2g30040.t1</i> | 353 | 39308.95 | 6.19 | 44.28 | 87.85 | -0.122 |

|                |                        |     |          |      |       |       |        |
|----------------|------------------------|-----|----------|------|-------|-------|--------|
| <i>FvF3H47</i> | <i>FvH4_2g35050.t1</i> | 375 | 42527.54 | 7.63 | 28.65 | 79.52 | -0.308 |
| <i>FvF3H48</i> | <i>FvH4_3g01280.t1</i> | 312 | 35555.86 | 5.11 | 38.4  | 80    | -0.385 |
| <i>FvF3H49</i> | <i>FvH4_3g02670.t1</i> | 350 | 39812.94 | 5.89 | 52.31 | 68.8  | -0.486 |
| <i>FvF3H50</i> | <i>FvH4_3g05530.t1</i> | 336 | 37704.19 | 6.03 | 40.76 | 83.01 | -0.213 |
| <i>FvF3H51</i> | <i>FvH4_3g06511.t3</i> | 331 | 37576.47 | 5.48 | 45.25 | 91.04 | -0.247 |
| <i>FvF3H52</i> | <i>FvH4_3g06513.t2</i> | 180 | 20261.2  | 5.64 | 37.16 | 87.72 | -0.349 |
| <i>FvF3H53</i> | <i>FvH4_3g07861.t1</i> | 284 | 31701.18 | 5.11 | 41.49 | 87.5  | -0.285 |
| <i>FvF3H54</i> | <i>FvH4_3g12330.t1</i> | 299 | 34345.34 | 5.15 | 41.1  | 73.65 | -0.4   |
| <i>FvF3H55</i> | <i>FvH4_3g12340.t1</i> | 316 | 35973.02 | 4.95 | 40.65 | 79.3  | -0.283 |
| <i>FvF3H56</i> | <i>FvH4_3g15580.t1</i> | 366 | 40353.21 | 5.58 | 33.72 | 89.7  | -0.211 |
| <i>FvF3H57</i> | <i>FvH4_3g16760.t1</i> | 337 | 37728.85 | 6.1  | 45.49 | 82.14 | -0.291 |
| <i>FvF3H58</i> | <i>FvH4_3g17470.t1</i> | 375 | 42592.59 | 5.15 | 39.08 | 87.36 | -0.358 |
| <i>FvF3H59</i> | <i>FvH4_3g21910.t1</i> | 329 | 37755.26 | 6.64 | 43.42 | 82.61 | -0.316 |
| <i>FvF3H60</i> | <i>FvH4_3g23800.t1</i> | 299 | 34389.24 | 5.49 | 34.88 | 75.28 | -0.428 |
| <i>FvF3H61</i> | <i>FvH4_3g28210.t1</i> | 316 | 36026.81 | 5.2  | 34.59 | 75.85 | -0.433 |
| <i>FvF3H62</i> | <i>FvH4_3g31880.t3</i> | 292 | 32981.03 | 6.23 | 44.71 | 97.77 | -0.157 |
| <i>FvF3H63</i> | <i>FvH4_3g36530.t1</i> | 344 | 38518.9  | 5.43 | 31.18 | 74.77 | -0.309 |
| <i>FvF3H64</i> | <i>FvH4_3g38920.t1</i> | 334 | 37594.87 | 6    | 32.93 | 87.75 | -0.3   |
| <i>FvF3H65</i> | <i>FvH4_3g45310.t1</i> | 364 | 40816.76 | 5.91 | 48.55 | 87.25 | -0.273 |
| <i>FvF3H66</i> | <i>FvH4_4g03240.t1</i> | 347 | 38599.8  | 5.09 | 39.38 | 94.7  | -0.228 |
| <i>FvF3H67</i> | <i>FvH4_4g03241.t1</i> | 355 | 40483.83 | 5.4  | 40.43 | 79.58 | -0.467 |
| <i>FvF3H68</i> | <i>FvH4_4g03250.t1</i> | 362 | 40794.32 | 5.14 | 34.07 | 88.51 | -0.332 |
| <i>FvF3H69</i> | <i>FvH4_4g03251.t1</i> | 361 | 40854.47 | 5.77 | 33.68 | 86.34 | -0.365 |
| <i>FvF3H70</i> | <i>FvH4_4g03260.t1</i> | 369 | 41479.06 | 5.32 | 42.24 | 83.44 | -0.363 |
| <i>FvF3H71</i> | <i>FvH4_4g03301.t1</i> | 288 | 32421.81 | 5.81 | 38.61 | 79.34 | -0.444 |
| <i>FvF3H72</i> | <i>FvH4_4g03303.t1</i> | 360 | 40671.12 | 5.52 | 32.83 | 84.97 | -0.396 |

|                |                        |     |          |      |       |       |        |
|----------------|------------------------|-----|----------|------|-------|-------|--------|
| <i>FvF3H73</i> | <i>FvH4_4g03304.tl</i> | 380 | 43013.35 | 6.61 | 34.92 | 89.95 | -0.334 |
| <i>FvF3H74</i> | <i>FvH4_4g03305.tl</i> | 366 | 40798.57 | 5.41 | 32    | 93.72 | -0.165 |
| <i>FvF3H75</i> | <i>FvH4_4g03323.tl</i> | 295 | 33764.57 | 5.78 | 47.38 | 84.74 | -0.331 |
| <i>FvF3H76</i> | <i>FvH4_4g14690.tl</i> | 256 | 28359.51 | 4.94 | 29.05 | 95.55 | -0.035 |
| <i>FvF3H77</i> | <i>FvH4_4g17720.tl</i> | 365 | 40986    | 7.62 | 37.52 | 87.01 | -0.335 |
| <i>FvF3H78</i> | <i>FvH4_4g20730.tl</i> | 319 | 35014.95 | 5.9  | 40.87 | 82.48 | -0.159 |
| <i>FvF3H79</i> | <i>FvH4_4g25590.tl</i> | 339 | 39053.48 | 5.92 | 32.91 | 87.4  | -0.417 |
| <i>FvF3H80</i> | <i>FvH4_4g33740.tl</i> | 362 | 39661.35 | 5.56 | 36.92 | 89.09 | -0.194 |
| <i>FvF3H81</i> | <i>FvH4_4g36510.t2</i> | 259 | 28983.96 | 5.48 | 51.48 | 86.15 | -0.269 |
| <i>FvF3H82</i> | <i>FvH4_5g01170.tl</i> | 383 | 42861.12 | 5.48 | 46.41 | 92.17 | -0.33  |
| <i>FvF3H83</i> | <i>FvH4_5g10430.tl</i> | 345 | 39074.61 | 5.74 | 41.35 | 88.99 | -0.323 |
| <i>FvF3H84</i> | <i>FvH4_5g19290.tl</i> | 312 | 35234.04 | 4.77 | 40.15 | 93.01 | -0.186 |
| <i>FvF3H85</i> | <i>FvH4_5g19300.tl</i> | 483 | 54666    | 8.96 | 69.78 | 68.22 | -0.689 |
| <i>FvF3H86</i> | <i>FvH4_5g19310.t2</i> | 302 | 33932.47 | 5.19 | 43.63 | 78.85 | -0.414 |
| <i>FvF3H87</i> | <i>FvH4_5g19321.tl</i> | 285 | 31848.09 | 5.36 | 38.42 | 85.62 | -0.358 |
| <i>FvF3H88</i> | <i>FvH4_5g19970.tl</i> | 358 | 40517.57 | 6.13 | 43.3  | 87.4  | -0.278 |
| <i>FvF3H89</i> | <i>FvH4_5g20420.tl</i> | 312 | 34710.37 | 5.59 | 31.19 | 88.43 | -0.215 |
| <i>FvF3H90</i> | <i>FvH4_5g20421.tl</i> | 365 | 40886.68 | 5.97 | 36.53 | 81.78 | -0.306 |
| <i>FvF3H91</i> | <i>FvH4_5g20430.tl</i> | 355 | 39778.23 | 5.75 | 35.86 | 82.2  | -0.304 |
| <i>FvF3H92</i> | <i>FvH4_5g20431.tl</i> | 357 | 40197.75 | 5.6  | 36.63 | 83.36 | -0.316 |
| <i>FvF3H93</i> | <i>FvH4_5g20432.t5</i> | 357 | 40197.75 | 5.49 | 34.82 | 82.55 | -0.318 |
| <i>FvF3H94</i> | <i>FvH4_5g21360.tl</i> | 542 | 61435.81 | 5.35 | 42.5  | 81.64 | -0.402 |
| <i>FvF3H95</i> | <i>FvH4_5g26041.tl</i> | 171 | 19022.78 | 5.55 | 44.47 | 91.75 | -0.1   |
| <i>FvF3H96</i> | <i>FvH4_5g33280.tl</i> | 348 | 39301.64 | 5.13 | 36.86 | 80.78 | -0.341 |
| <i>FvF3H97</i> | <i>FvH4_5g35660.tl</i> | 369 | 41255.88 | 5.85 | 32.74 | 85.91 | -0.321 |
| <i>FvF3H98</i> | <i>FvH4_5g38040.tl</i> | 357 | 39577.12 | 5.25 | 39.83 | 84.76 | -0.245 |

|                 |                        |     |          |      |       |       |        |
|-----------------|------------------------|-----|----------|------|-------|-------|--------|
| <i>FvF3H99</i>  | <i>FvH4_5g38050.tl</i> | 355 | 39316.79 | 5.25 | 47.02 | 85.24 | -0.225 |
| <i>FvF3H100</i> | <i>FvH4_6g13281.tl</i> | 166 | 18588.46 | 7.79 | 38.39 | 87.47 | -0.356 |
| <i>FvF3H101</i> | <i>FvH4_6g13290.tl</i> | 364 | 40867.68 | 5.52 | 47.44 | 89.45 | -0.352 |
| <i>FvF3H102</i> | <i>FvH4_6g13300.tl</i> | 365 | 41496.31 | 5.3  | 47.68 | 92.03 | -0.318 |
| <i>FvF3H103</i> | <i>FvH4_6g13322.tl</i> | 355 | 40120.96 | 5.74 | 35.31 | 91.94 | -0.35  |
| <i>FvF3H104</i> | <i>FvH4_6g17160.tl</i> | 477 | 54548.55 | 6.35 | 54.04 | 86.79 | -0.23  |
| <i>FvF3H105</i> | <i>FvH4_6g19280.tl</i> | 369 | 41416.18 | 5.43 | 37.59 | 88.34 | -0.234 |
| <i>FvF3H106</i> | <i>FvH4_6g19290.tl</i> | 208 | 23069.47 | 5.17 | 33.22 | 98.41 | -0.057 |
| <i>FvF3H107</i> | <i>FvH4_6g27770.tl</i> | 340 | 38439.03 | 5.32 | 46.09 | 86.24 | -0.363 |
| <i>FvF3H108</i> | <i>FvH4_6g28170.tl</i> | 366 | 41096.17 | 5.45 | 41.19 | 91.28 | -0.283 |
| <i>FvF3H109</i> | <i>FvH4_6g30750.tl</i> | 313 | 35890.93 | 5.4  | 37.47 | 76.9  | -0.36  |
| <i>FvF3H110</i> | <i>FvH4_6g30760.tl</i> | 316 | 36040.06 | 5.72 | 33.42 | 82.34 | -0.384 |
| <i>FvF3H111</i> | <i>FvH4_6g30780.tl</i> | 358 | 40063.75 | 6.62 | 48.41 | 88.77 | -0.227 |
| <i>FvF3H112</i> | <i>FvH4_6g39151.tl</i> | 348 | 38753.67 | 5.49 | 46.41 | 85.46 | -0.373 |
| <i>FvF3H113</i> | <i>FvH4_6g42090.tl</i> | 320 | 36233.31 | 5.08 | 31.46 | 80.75 | -0.409 |
| <i>FvF3H114</i> | <i>FvH4_6g42700.tl</i> | 316 | 36088.89 | 5.19 | 36.43 | 74.62 | -0.438 |
| <i>FvF3H115</i> | <i>FvH4_7g06780.tl</i> | 384 | 43322.95 | 5.47 | 47.45 | 80.16 | -0.393 |
| <i>FvF3H116</i> | <i>FvH4_7g10320.tl</i> | 208 | 23307.68 | 5.08 | 36.89 | 93.17 | -0.275 |
| <i>FvF3H117</i> | <i>FvH4_7g10930.tl</i> | 167 | 19272.68 | 5.97 | 30.02 | 80.54 | -0.503 |
| <i>FvF3H118</i> | <i>FvH4_7g12600.tl</i> | 379 | 42918.84 | 5.34 | 28.38 | 78.42 | -0.268 |
| <i>FvF3H119</i> | <i>FvH4_7g12610.t2</i> | 348 | 39185.53 | 5.82 | 32.93 | 79.2  | -0.351 |
| <i>FvF3H120</i> | <i>FvH4_7g14240.tl</i> | 339 | 38518.66 | 5.92 | 44.51 | 75.28 | -0.384 |
| <i>FvF3H121</i> | <i>FvH4_7g15780.tl</i> | 316 | 35913.63 | 5.72 | 40.39 | 69.37 | -0.491 |
| <i>FvF3H122</i> | <i>FvH4_7g17840.tl</i> | 345 | 38965.13 | 5.79 | 39.05 | 86.72 | -0.362 |
| <i>FvF3H123</i> | <i>FvH4_7g28670.tl</i> | 373 | 42457.11 | 5.52 | 35.14 | 70.05 | -0.449 |
| <i>FvF3H124</i> | <i>FvH4_7g30770.t2</i> | 371 | 41776.35 | 5.23 | 38.4  | 77.45 | -0.381 |

|                 |                        |     |          |      |       |       |        |
|-----------------|------------------------|-----|----------|------|-------|-------|--------|
| <i>FvF3H125</i> | <i>FvH4_7g31470.t1</i> | 401 | 45397.51 | 6.44 | 35.56 | 90.42 | -0.259 |
| <i>FvF3H126</i> | <i>FvH4_7g32980.t1</i> | 338 | 38619.84 | 5.84 | 44.46 | 83.58 | -0.436 |

**Supplementary Table S2.** The secondary structure prediction and subcellular location prediction of *FvF3H* proteins

| name           | Alpha helix | Random coil | Extended strand | Subcellular location |               |                       |                 |                                             |
|----------------|-------------|-------------|-----------------|----------------------|---------------|-----------------------|-----------------|---------------------------------------------|
| <i>FvF3H1</i>  | 26.37%      | 53.05%      | 20.58%          | cytoplasm            | nucleus       | cytoskeleton          | chloroplast     | extracellular                               |
| <i>FvF3H2</i>  | 31.75%      | 44.85%      | 23.40%          |                      | cytoplasm     | chloroplast           | nucleus         |                                             |
| <i>FvF3H3</i>  | 38.35%      | 44.25%      | 17.40%          |                      | nucleus       | cytoskeleton          | cytoplasm       | extracellular                               |
| <i>FvF3H4</i>  | 38.35%      | 44.25%      | 17.40%          | nucleus              | cytoplasm     | chloroplast           | extracellular   | cytoskeleton                                |
| <i>FvF3H5</i>  | 36.72%      | 48.02%      | 15.25%          |                      | cytoplasm     | chloroplast           | cytoskeleton    | nucleus                                     |
| <i>FvF3H6</i>  | 36.72%      | 48.02%      | 15.25%          |                      | cytoplasm     | chloroplast           | nucleus         | cytoskeleton                                |
| <i>FvF3H7</i>  | 42.66%      | 44.35%      | 12.99%          |                      | cytoplasm     | cytoskeleton          | nucleus         |                                             |
| <i>FvF3H8</i>  | 33.99%      | 47.88%      | 18.13%          | cytoplasm            | cytoskeleton  | chloroplast           | nucleus         | Golgi apparatus                             |
| <i>FvF3H9</i>  | 33.96%      | 50.57%      | 15.47%          |                      |               | cytoplasm             | nucleus         |                                             |
| <i>FvF3H10</i> | 33.96%      | 50.57%      | 15.47%          |                      | chloroplast   | nucleus               | cytoplasm       | extracellular                               |
| <i>FvF3H11</i> | 34.68%      | 49.19%      | 16.13%          |                      |               | cytoskeleton          | nucleus         |                                             |
| <i>FvF3H12</i> | 34.88%      | 50.53%      | 14.59%          | cytoplasm            | nucleus       | mitochondrion         | chloroplast     | cytoskeleton                                |
| <i>FvF3H13</i> | 33.44%      | 48.20%      | 18.36%          |                      | nucleus       | cytoplasm             | plasma membrane | cytoskeleton                                |
| <i>FvF3H14</i> | 32.57%      | 51.14%      | 16.29%          |                      | cytoplasm     | nucleus               | extracellular   | cytoskeleton Golgi apparatus                |
| <i>FvF3H15</i> | 38.72%      | 43.77%      | 17.51%          |                      | nucleus       | cytoskeleton          | cytoplasm       | endoplasmic reticulum vacular membrane      |
| <i>FvF3H16</i> | 30.77%      | 48.35%      | 20.88%          | nucleus              | cytoplasm     | chloroplast           | plasma membrane | mitochondrion plasma membrane               |
|                |             |             |                 |                      |               | endoplasmic reticulum | cytoskeleton    |                                             |
| <i>FvF3H17</i> | 37.66%      | 49.79%      | 12.55%          | cytoplasm            | mitochondrion | plasma membrane       | Golgi apparatus | cytoskeleton nucleus                        |
| <i>FvF3H18</i> | 28.70%      | 57.68%      | 13.62%          |                      | nucleus       | cytoplasm             | chloroplast     | mitochondrion plasma membrane extracellular |
| <i>FvF3H19</i> | 43.10%      | 46.44%      | 10.46%          | cytoplasm            | cytoskeleton  | plasma membrane       | mitochondrion   | Endoplasmic reticulum peroxisome            |
| <i>FvF3H20</i> | 45.39%      | 40.62%      | 13.98%          |                      | cytoplasm     | nucleus               | chloroplast     | Golgi apparatus                             |
| <i>FvF3H21</i> | 48.10%      | 38.35%      | 13.55%          |                      | cytoplasm     | chloroplast           | nucleus         | peroxisome Golgi apparatus                  |

|                |        |        |        |                                                                                     |
|----------------|--------|--------|--------|-------------------------------------------------------------------------------------|
| <i>FvF3H22</i> | 15.95% | 15.95% | 15.95% | cytoplasm cytoskeleton extracellular Golgi apparatus                                |
| <i>FvF3H23</i> | 29.45% | 54.60% | 15.95% | cytoskeleton cytoplasm endoplasmic reticulum vacular membrane nucleus               |
| <i>FvF3H24</i> | 30.20% | 55.27% | 14.53% | cytoplasm nucleus cytoskeleton                                                      |
| <i>FvF3H25</i> | 28.05% | 51.84% | 20.11% | cytoplasm nucleus cytoskeleton chloroplast endoplasmic reticulum vacular membrane   |
| <i>FvF3H26</i> | 33.90% | 45.87% | 20.23% | nucleus cytoplasm chloroplast cytoskeleton                                          |
| <i>FvF3H27</i> | 24.71% | 53.16% | 22.13% | cytoplasm nucleus chloroplast plasma membrane                                       |
| <i>FvF3H28</i> | 33.11% | 49.67% | 17.22% | cytoplasm nucleus                                                                   |
| <i>FvF3H29</i> | 32.15% | 45.50% | 22.34% | cytoplasm nucleus cytoskeleton                                                      |
| <i>FvF3H30</i> | 34.21% | 48.12% | 17.67% | cytoplasm nucleus chloroplast extracellular                                         |
| <i>FvF3H31</i> | 30.66% | 47.28% | 22.06% | cytoplasm nucleus chloroplast extracellular cytoskeleton                            |
| <i>FvF3H32</i> | 32.94% | 45.99% | 21.07% | chloroplast mitochondrion peroxisome cytoplasm nucleus                              |
| <i>FvF3H33</i> | 30.12% | 51.17% | 18.71% | cytoplasm nucleus peroxisome Golgi apparatus                                        |
| <i>FvF3H34</i> | 35.94% | 45.20% | 18.86% | cytoplasm nucleus                                                                   |
| <i>FvF3H35</i> | 29.51% | 53.44% | 17.05% | nucleus cytoplasm chloroplast mitochondrion plasma membrane                         |
| <i>FvF3H36</i> | 38.36% | 48.22% | 13.42% | cytoplasm nucleus chloroplast vacular membrane                                      |
| <i>FvF3H37</i> | 36.17% | 44.68% | 19.15% | nucleus cytoplasm extracellular cytoskeleton                                        |
| <i>FvF3H38</i> | 29.25% | 52.54% | 18.21% | cytoplasm nucleus cytoskeleton plasm membrane chloroplast Golgi apparatus           |
| <i>FvF3H39</i> | 39.45% | 42.56% | 17.99% | cytoplasm Endoplasmic reticulum chloroplast nucleus mitochondrion                   |
| <i>FvF3H40</i> | 29.53% | 52.05% | 18.42% | nucleus cytoplasm cytoskeleton plasma membrane                                      |
| <i>FvF3H41</i> | 41.51% | 45.60% | 12.89% | nucleus cytoplasm chloroplast cytoskeleton                                          |
| <i>FvF3H42</i> | 36.81% | 49.08% | 14.11% | cytoplasm nucleus chloroplast cytoskeleton extracellular                            |
| <i>FvF3H43</i> | 31.55% | 52.08% | 16.37% | cytoplasm nucleus cytoskeleton extracellular endoplasmic reticulum vacular membrane |
| <i>FvF3H44</i> | 36.66% | 47.80% | 15.54% | cytoskeleton nucleus cytoplasm                                                      |
| <i>FvF3H45</i> | 39.30% | 47.21% | 13.49% | cytoplasm nucleus peroxisome                                                        |
| <i>FvF3H46</i> | 37.39% | 48.16% | 14.45% | cytoplasm nucleus chloroplast                                                       |
| <i>FvF3H47</i> | 39.20% | 48.27% | 12.53% | chloroplast mitochondrion cytoplasm plasma membrane                                 |



|                |        |        |        |             |                       |               |                                                                     |
|----------------|--------|--------|--------|-------------|-----------------------|---------------|---------------------------------------------------------------------|
| <i>FvF3H48</i> | 39.10% | 45.51% | 15.38% | cytoplasm   | nucleus               | chloroplast   | cytoskeleton                                                        |
| <i>FvF3H49</i> | 35.71% | 50.00% | 14.29% | nucleus     | chloroplast           | extracellular | vacular membrane                                                    |
| <i>FvF3H50</i> | 31.55% | 46.13% | 22.32% | nucleus     | cytoplasm             | chloroplast   | Golgi apparatus                                                     |
| <i>FvF3H51</i> | 36.81% | 47.22% | 15.97% | cytoplasm   | Endoplasmic reticulum | nucleus       | cytoskeleyon                                                        |
| <i>FvF3H52</i> | 27.78% | 50.00% | 22.22% | cytoplasm   | nucleus               |               |                                                                     |
| <i>FvF3H53</i> | 41.90% | 46.48% | 11.62% | nucleus     | cytoplasm             | extracellular | cytoskeleton Golgi apparatus Endoplasmic reticulum vacular membrane |
| <i>FvF3H54</i> | 40.13% | 46.82% | 13.04% | nucleus     | chloroplast           | cytoskeleton  | cytoskeleton                                                        |
| <i>FvF3H55</i> | 42.41% | 46.20% | 11.39% | nucleus     | cytoplasm             | cytoskeleton  |                                                                     |
| <i>FvF3H56</i> | 32.51% | 48.63% | 18.85% | cytoplasm   | extracellular         | cytoskeleton  | chloroplast                                                         |
| <i>FvF3H57</i> | 29.08% | 48.66% | 22.26% | chloroplast | mitochondrion         | nucleus       | mitochondrion cytoplasm plasma membrane                             |
| <i>FvF3H58</i> | 39.47% | 46.93% | 13.60% | cytoplasm   | nucleus               | extracellular | Golgi apparatus                                                     |
| <i>FvF3H59</i> | 36.17% | 44.68% | 19.15% | nucleus     | cytoplasm             | extracellular | cytoskeleton                                                        |
| <i>FvF3H60</i> | 38.13% | 46.49% | 15.38% | nucleus     | chloroplast           | extracellular |                                                                     |
| <i>FvF3H61</i> | 31.96% | 52.22% | 15.82% | cytoplasm   | nucleus               | extracellular | vacular membrane cytoskeleton                                       |
| <i>FvF3H62</i> | 43.15% | 36.64% | 20.21% | cytoplasm   | chloroplast           | nucleus       | peroxisome cytoskeleton                                             |
| <i>FvF3H63</i> | 23.55% | 57.56% | 18.90% | nucleus     | cytoplasm             | chloroplast   | vacular membrane                                                    |
| <i>FvF3H64</i> | 21.56% | 59.58% | 18.86% | nucleus     | cytoplasm             | chloroplast   | mitochondrion plasma membrane cytoskeleton                          |
| <i>FvF3H65</i> | 36.54% | 47.25% | 16.21% | peroxisome  | cytoplasm             | nucleus       | extracellular                                                       |
| <i>FvF3H66</i> | 32.28% | 52.16% | 15.56% | cytoplasm   | nucleus               | extracellular | cytoskeleton                                                        |
| <i>FvF3H67</i> | 29.58% | 54.93% | 15.49% | nucleus     | cytoplasm             | peroxisome    | extracellular cytoskeleton                                          |
| <i>FvF3H68</i> | 30.11% | 56.63% | 13.26% | cytoplasm   | mitochondrion         | chloroplast   | nucleus endoplasmic reticulum peroxisome                            |
| <i>FvF3H69</i> | 32.13% | 55.40% | 12.47% | cytoplasm   | nucleus               | chloroplast   | mitochondrion plasma membrane endoplasmic reticulum                 |
| <i>FvF3H70</i> | 26.56% | 56.64% | 16.80% | cytoplasm   | nucleus               | peroxisome    |                                                                     |
| <i>FvF3H71</i> | 28.42% | 57.92% | 13.66% | cytoplasm   | nucleus               | cytoskeleton  | chloroplast peroxisome                                              |
| <i>FvF3H72</i> | 34.44% | 49.44% | 16.11% | cytoplasm   | nucleus               | chloroplast   | extracellular cytoskeleton                                          |

|                |        |        |        |             |                  |                       |                 |                       |                  |                 |
|----------------|--------|--------|--------|-------------|------------------|-----------------------|-----------------|-----------------------|------------------|-----------------|
| <i>FvF3H73</i> | 38.16% | 43.68% | 18.16% | chloroplast | mitochondrion    | cytoplasm             | nucleus         | vacular membrane      |                  |                 |
| <i>FvF3H74</i> | 38.52% | 48.36% | 13.11% |             |                  | cytoplasm             | nucleus         | peroxisome            |                  |                 |
| <i>FvF3H75</i> | 40.17% | 45.98% | 13.85% |             |                  | cytoplasm             | nucleus         | cytoskeleton          |                  |                 |
| <i>FvF3H76</i> | 43.75% | 41.41% | 14.84% |             |                  | cytoplasm             | chloroplast     | nucleus               |                  |                 |
| <i>FvF3H77</i> | 32.60% | 54.25% | 13.15% |             | nucleus          | cytoplasm             | chloroplast     | cytoskeleton          |                  |                 |
| <i>FvF3H78</i> | 29.78% | 52.04% | 18.18% | cytoplasm   | nucleus          | extracellular         | chloroplast     | cytoskeleton          | Golgi apparatus  |                 |
| <i>FvF3H79</i> | 33.33% | 48.67% | 17.99% | cytoplasm   | chloroplast      | mitochondrion         | plasma membrane | nucleus               | cytoskeleton     |                 |
| <i>FvF3H80</i> | 26.52% | 53.31% | 20.17% |             |                  | cytoplasm             | cytoskeleton    | nucleus               | extracellular    |                 |
| <i>FvF3H81</i> | 36.72% | 51.34% | 11.94% |             |                  | nucleus               | cytoplasm       | chloroplast           | extracellular    |                 |
| <i>FvF3H82</i> | 39.95% | 45.69% | 14.36% | chloroplast | cytoplasm        | cytoskeleton          | nucleus         | mitochondrion         | Golgi apparatus  |                 |
| <i>FvF3H83</i> | 39.13% | 47.25% | 13.62% |             |                  | cytoplasm             | nucleus         | cytoskeleton          | plasma membrane  | extracellular   |
| <i>FvF3H84</i> | 39.42% | 50.64% | 9.94%  | cytoplasm   | mitochondrion    | Chloroplast           | plasma membrane | Endoplasmic reticulum |                  |                 |
| <i>FvF3H85</i> | 26.09% | 62.11% | 11.80% |             |                  | nucleus               | chloroplast     | cytoplasm             | cytoskeleton     |                 |
| <i>FvF3H86</i> | 32.99% | 54.17% | 12.85% |             |                  | cytoplasm             | nucleus         | mitochondrion         | plasma membrane  | peroxisome      |
| <i>FvF3H87</i> | 33.88% | 49.59% | 16.53% | cytoplasm   | chloroplast      | nucleus               | cytoskeleton    | endoplasmic reticulum | vacular membrane |                 |
| <i>FvF3H88</i> | 36.03% | 49.16% | 14.80% |             |                  | cytoplasm             | nucleus         | cytoskeleton          | chloroplast      |                 |
| <i>FvF3H89</i> | 32.69% | 44.23% | 23.08% |             |                  | cytoplasm             | nucleus         | chloroplast           |                  |                 |
| <i>FvF3H90</i> | 33.15% | 47.95% | 18.90% |             |                  | cytoskeleton          | cytoplasm       | nucleus               |                  |                 |
| <i>FvF3H91</i> | 40.56% | 43.94% | 15.49% |             | cytoskeleton     | nucleus               | chloroplast     | cytoplasm             | plasma membrane  |                 |
| <i>FvF3H92</i> | 42.58% | 41.46% | 15.97% |             |                  |                       | cytoskeleton    |                       |                  |                 |
| <i>FvF3H93</i> | 34.73% | 48.46% | 16.81% |             |                  |                       | cytoskeleton    | cytoplasm             |                  |                 |
| <i>FvF3H94</i> | 42.80% | 43.91% | 13.28% | cytoplasm   | vacular membrane | endoplasmic reticulum | Golgi apparatus | chloroplast           | plasma membrane  |                 |
| <i>FvF3H95</i> | 32.75% | 54.97% | 12.28% | cytoplasm   | nucleus          | extracellular         | chloroplast     | mitochondrion         | cytoskeleton     | Golgi apparatus |
| <i>FvF3H96</i> | 38.79% | 45.11% | 16.09% |             |                  | cytoskeleton          | cytoplasm       | nucleus               | plasma membrane  |                 |
| <i>FvF3H97</i> | 35.50% | 50.68% | 13.82% |             |                  | cytoplasm             | nucleus         | extracellular         | peroxisome       |                 |

|                 |        |        |        |              |                  |                 |                 |                  |                  |
|-----------------|--------|--------|--------|--------------|------------------|-----------------|-----------------|------------------|------------------|
| <i>FvF3H98</i>  | 37.25% | 47.90% | 14.85% | cytoskeleton | cytoplasm        | nucleus         |                 |                  |                  |
| <i>FvF3H99</i>  | 38.03% | 47.61% | 14.37% | cytoplasm    | cytoskeleton     | nucleus         | chloroplast     | vacular membrane |                  |
| <i>FvF3H100</i> | 18.07% | 55.42% | 26.51% | cytoplasm    | extracellular    | nucleus         | cytoskeleton    | Golgi apparatus  |                  |
| <i>FvF3H101</i> | 30.30% | 54.55% | 15.15% | cytoplasm    | cytoskeleton     | nucleus         | chloroplast     |                  |                  |
| <i>FvF3H102</i> | 33.97% | 49.32% | 16.71% | cytoplasm    | extracellular    | cytoskeleton    |                 |                  |                  |
| <i>FvF3H103</i> | 31.83% | 44.79% | 23.38% | cytoplasm    | chloroplast      | nucleus         |                 |                  |                  |
| <i>FvF3H104</i> | 35.22% | 48.85% | 15.93% | chloroplast  | vacular membrane | nucleus         | mitochondrion   | extracellular    | Golgi apparatus  |
| <i>FvF3H105</i> | 33.45% | 49.31% | 17.24% | cytoplasm    | nucleus          | mitochondrion   | peroxisome      |                  |                  |
| <i>FvF3H106</i> | 37.98% | 43.27% | 18.75% | cytoplasm    | extracellular    | cytoskeleton    | Golgi apparatus |                  |                  |
| <i>FvF3H107</i> | 28.53% | 49.12% | 22.35% | cytoplasm    | nucleus          | chloroplast     | nucleus         | peroxisome       | Golgi apparatus  |
| <i>FvF3H108</i> | 32.79% | 48.09% | 19.13% | cytoplasm    | cytoskeleton     | chloroplast     | nucleus         | peroxisome       |                  |
| <i>FvF3H109</i> | 32.91% | 51.44% | 15.65% | nucleus      | cytoplasm        | extracellular   | chloroplast     | cytoskeleton     |                  |
| <i>FvF3H110</i> | 34.49% | 51.27% | 14.24% | cytoplasm    | nucleus          | extracellular   | peroxisome      | cytoskeleton     |                  |
| <i>FvF3H111</i> | 29.05% | 53.91% | 17.04% | nucleus      | cytoplasm        | plasma membrane | Golgi apparatus | plasma membrane  | mitochondrion    |
|                 |        |        |        |              |                  | peroxisome      | cytoskeleton    |                  |                  |
| <i>FvF3H112</i> | 26.44% | 53.16% | 20.40% | cytoplasm    | nucleus          | cytoskeleton    |                 |                  |                  |
| <i>FvF3H113</i> | 38.12% | 45.00% | 16.88% | cytoplasm    | cytoskeleton     | chloroplast     | nucleus         |                  |                  |
| <i>FvF3H114</i> | 31.65% | 52.85% | 15.51% | nucleus      | cytoplasm        | chloroplast     | extracellular   | vacular membrane |                  |
| <i>FvF3H115</i> | 27.34% | 56.51% | 16.15% | nucleus      | chloroplast      | cytoplasm       | extracellular   | vacular membrane |                  |
| <i>FvF3H116</i> | 23.08% | 52.88% | 24.04% | nucleus      | mitochondrion    | cytoplasm       | extracellular   | cytoskeleton     |                  |
| <i>FvF3H117</i> | 32.93% | 48.50% | 18.56% | cytoskeleton | nucleus          | cytoplasm       | extracellular   | Golgi apparatus  |                  |
| <i>FvF3H118</i> | 36.41% | 50.66% | 12.93% | cytoplasm    | nucleus          | peroxisome      | mitochondrion   | extracellular    | vacular membrane |
| <i>FvF3H119</i> | 31.73% | 49.60% | 18.67% |              | nucleus          | cytoplasm       | cytoskeleton    | chloroplast      |                  |
| <i>FvF3H120</i> | 30.38% | 48.97% | 20.65% | nucleus      | cytoplasm        | chloroplast     | extracellular   | vacular membrane |                  |
| <i>FvF3H121</i> | 25.63% | 55.70% | 18.67% | nucleus      | cytoplasm        | chloroplast     | extracellular   | vacular membrane |                  |
| <i>FvF3H122</i> | 24.35% | 54.49% | 21.16% | cytoplasm    | chloroplast      | cytoskeleton    | plasma membrane | nucleus          |                  |

|                 |        |        |        |               |              |               |                  |               |                  |       |  |
|-----------------|--------|--------|--------|---------------|--------------|---------------|------------------|---------------|------------------|-------|--|
| <i>FvF3H123</i> | 38.07% | 46.38% | 15.55% | nucleus       | cytoskeleton | extracellular | vacular membrane |               |                  |       |  |
| <i>FvF3H124</i> | 42.61% | 46.67% | 10.72% | cytoplasm     | nucleus      | chloroplast   | mitochondrion    | extracellular | vacular membrane |       |  |
| <i>FvF3H125</i> | 42.89% | 43.64% | 13.47% | mitochondrion | cytoplasm    | mitochondrion | nucleus          | chloroplast   | plasma membrane  | Golgi |  |
| <i>FvF3H126</i> | 34.02% | 44.97% | 21.01% |               |              |               | apparatus        |               |                  |       |  |
|                 |        |        |        | peroxisome    | chloroplast  | nucleus       | mitochondrion    | cytoplasm     |                  |       |  |

**Supplementary Table S3.** *FvF3H* gene codon preference parameter

| name           | T3s    | C3s    | A3s    | G3s    | CAI   | CBI    | Fop   | Nc    | GC3s  | GC    |
|----------------|--------|--------|--------|--------|-------|--------|-------|-------|-------|-------|
| <i>FvF3H1</i>  | 0.3891 | 0.3463 | 0.274  | 0.2969 | 0.263 | 0.008  | 0.432 | 56    | 0.334 | 0.419 |
| <i>FvF3H2</i>  | 0.4245 | 0.205  | 0.3755 | 0.2548 | 0.186 | -0.112 | 0.345 | 47.64 | 0.357 | 0.426 |
| <i>FvF3H3</i>  | 0.4038 | 0.2154 | 0.3977 | 0.2627 | 0.187 | -0.14  | 0.331 | 49.28 | 0.358 | 0.414 |
| <i>FvF3H4</i>  | 0.419  | 0.2253 | 0.3969 | 0.251  | 0.209 | -0.064 | 0.373 | 51.03 | 0.36  | 0.417 |
| <i>FvF3H5</i>  | 0.366  | 0.2453 | 0.4045 | 0.2851 | 0.196 | -0.058 | 0.375 | 55.82 | 0.361 | 0.428 |
| <i>FvF3H6</i>  | 0.4296 | 0.2222 | 0.3603 | 0.2782 | 0.188 | -0.073 | 0.362 | 50.34 | 0.362 | 0.421 |
| <i>FvF3H7</i>  | 0.386  | 0.2316 | 0.3985 | 0.2794 | 0.182 | -0.088 | 0.356 | 52.19 | 0.362 | 0.408 |
| <i>FvF3H8</i>  | 0.3963 | 0.2222 | 0.4231 | 0.2692 | 0.182 | -0.096 | 0.353 | 49.14 | 0.37  | 0.417 |
| <i>FvF3H9</i>  | 0.3618 | 0.2663 | 0.4043 | 0.3118 | 0.189 | -0.095 | 0.366 | 52.2  | 0.373 | 0.425 |
| <i>FvF3H10</i> | 0.2577 | 0.378  | 0.3008 | 0.3165 | 0.213 | 0.052  | 0.442 | 56.23 | 0.375 | 0.424 |
| <i>FvF3H11</i> | 0.2727 | 0.3434 | 0.3223 | 0.3548 | 0.198 | -0.064 | 0.382 | 59.3  | 0.376 | 0.423 |
| <i>FvF3H12</i> | 0.4253 | 0.2353 | 0.3532 | 0.2857 | 0.203 | -0.039 | 0.391 | 55.9  | 0.38  | 0.424 |
| <i>FvF3H13</i> | 0.3906 | 0.3262 | 0.3226 | 0.2864 | 0.255 | 0.028  | 0.446 | 60    | 0.38  | 0.453 |
| <i>FvF3H14</i> | 0.3463 | 0.3723 | 0.3239 | 0.3073 | 0.241 | -0.004 | 0.429 | 59.41 | 0.381 | 0.416 |
| <i>FvF3H15</i> | 0.3853 | 0.2641 | 0.3    | 0.3175 | 0.222 | -0.01  | 0.406 | 49.44 | 0.382 | 0.417 |
| <i>FvF3H16</i> | 0.25   | 0.4118 | 0.1893 | 0.4466 | 0.248 | 0.06   | 0.454 | 52.95 | 0.383 | 0.443 |
| <i>FvF3H17</i> | 0.4149 | 0.2128 | 0.4048 | 0.2763 | 0.2   | -0.084 | 0.377 | 51.99 | 0.385 | 0.429 |
| <i>FvF3H18</i> | 0.3275 | 0.331  | 0.2969 | 0.2929 | 0.208 | -0.026 | 0.399 | 58    | 0.385 | 0.413 |
| <i>FvF3H19</i> | 0.4316 | 0.2842 | 0.2889 | 0.2654 | 0.205 | -0.043 | 0.385 | 58.94 | 0.391 | 0.439 |
| <i>FvF3H20</i> | 0.4141 | 0.2381 | 0.3094 | 0.3175 | 0.195 | -0.063 | 0.376 | 53.7  | 0.391 | 0.449 |
| <i>FvF3H21</i> | 0.4198 | 0.2363 | 0.3009 | 0.3317 | 0.197 | -0.056 | 0.38  | 53.35 | 0.392 | 0.431 |
| <i>FvF3H22</i> | 0.4065 | 0.2645 | 0.2609 | 0.344  | 0.195 | -0.079 | 0.361 | 59.57 | 0.394 | 0.432 |

|                |        |        |        |        |       |        |       |       |       |       |
|----------------|--------|--------|--------|--------|-------|--------|-------|-------|-------|-------|
| <i>FvF3H23</i> | 0.3936 | 0.2771 | 0.3291 | 0.3077 | 0.199 | -0.019 | 0.403 | 48.37 | 0.394 | 0.432 |
| <i>FvF3H24</i> | 0.3596 | 0.3034 | 0.3256 | 0.3237 | 0.192 | -0.078 | 0.372 | 52.42 | 0.397 | 0.427 |
| <i>FvF3H25</i> | 0.3902 | 0.2917 | 0.3233 | 0.3012 | 0.206 | -0.06  | 0.378 | 54.81 | 0.399 | 0.429 |
| <i>FvF3H26</i> | 0.3759 | 0.2895 | 0.3482 | 0.319  | 0.196 | -0.086 | 0.362 | 51.1  | 0.399 | 0.441 |
| <i>FvF3H27</i> | 0.4078 | 0.305  | 0.3045 | 0.2844 | 0.216 | -0.048 | 0.395 | 59.54 | 0.4   | 0.423 |
| <i>FvF3H28</i> | 0.3361 | 0.3361 | 0.3636 | 0.25   | 0.188 | -0.038 | 0.4   | 57.1  | 0.4   | 0.417 |
| <i>FvF3H29</i> | 0.3883 | 0.2747 | 0.3696 | 0.2643 | 0.181 | -0.114 | 0.348 | 54.7  | 0.401 | 0.432 |
| <i>FvF3H30</i> | 0.3684 | 0.2727 | 0.2979 | 0.3352 | 0.219 | 0.036  | 0.438 | 58.57 | 0.402 | 0.435 |
| <i>FvF3H31</i> | 0.4038 | 0.2346 | 0.3802 | 0.2785 | 0.186 | -0.07  | 0.364 | 49.02 | 0.405 | 0.433 |
| <i>FvF3H32</i> | 0.4022 | 0.2362 | 0.3825 | 0.2731 | 0.183 | -0.078 | 0.36  | 49.03 | 0.41  | 0.433 |
| <i>FvF3H33</i> | 0.386  | 0.3051 | 0.3098 | 0.2689 | 0.229 | 0.003  | 0.411 | 55.03 | 0.41  | 0.444 |
| <i>FvF3H34</i> | 0.3241 | 0.2828 | 0.3811 | 0.298  | 0.194 | -0.029 | 0.397 | 52.38 | 0.411 | 0.438 |
| <i>FvF3H35</i> | 0.3516 | 0.2912 | 0.358  | 0.2532 | 0.218 | 0.019  | 0.433 | 61    | 0.414 | 0.426 |
| <i>FvF3H36</i> | 0.3367 | 0.3299 | 0.2989 | 0.3125 | 0.232 | 0.021  | 0.426 | 58.7  | 0.414 | 0.426 |
| <i>FvF3H37</i> | 0.3891 | 0.2802 | 0.3745 | 0.276  | 0.207 | -0.041 | 0.393 | 56.94 | 0.414 | 0.442 |
| <i>FvF3H38</i> | 0.3092 | 0.4056 | 0.2351 | 0.3739 | 0.246 | -0.014 | 0.409 | 54.7  | 0.417 | 0.423 |
| <i>FvF3H39</i> | 0.327  | 0.3081 | 0.2589 | 0.4    | 0.23  | -0.021 | 0.395 | 55.14 | 0.419 | 0.427 |
| <i>FvF3H40</i> | 0.4396 | 0.2857 | 0.264  | 0.2788 | 0.217 | -0.053 | 0.382 | 56.33 | 0.42  | 0.469 |
| <i>FvF3H41</i> | 0.4298 | 0.2314 | 0.3249 | 0.3018 | 0.197 | -0.082 | 0.375 | 58.85 | 0.421 | 0.443 |
| <i>FvF3H42</i> | 0.2803 | 0.4017 | 0.2308 | 0.3839 | 0.257 | 0.044  | 0.442 | 54.75 | 0.424 | 0.433 |
| <i>FvF3H43</i> | 0.4228 | 0.2904 | 0.2451 | 0.2906 | 0.205 | -0.01  | 0.401 | 53.65 | 0.425 | 0.432 |
| <i>FvF3H44</i> | 0.3755 | 0.2996 | 0.304  | 0.2902 | 0.216 | -0.064 | 0.372 | 58.28 | 0.426 | 0.444 |
| <i>FvF3H45</i> | 0.3835 | 0.3047 | 0.2741 | 0.2731 | 0.235 | 0.006  | 0.412 | 59.54 | 0.426 | 0.439 |
| <i>FvF3H46</i> | 0.3945 | 0.3495 | 0.229  | 0.2614 | 0.237 | 0.033  | 0.435 | 56.52 | 0.427 | 0.436 |
| <i>FvF3H47</i> | 0.3828 | 0.3333 | 0.2667 | 0.3031 | 0.22  | -0.015 | 0.413 | 57.22 | 0.431 | 0.466 |
| <i>FvF3H48</i> | 0.2655 | 0.4381 | 0.2694 | 0.3689 | 0.261 | 0.007  | 0.425 | 53.2  | 0.432 | 0.452 |

|                |        |        |        |        |       |        |       |       |       |       |
|----------------|--------|--------|--------|--------|-------|--------|-------|-------|-------|-------|
| <i>FvF3H49</i> | 0.347  | 0.3134 | 0.304  | 0.3502 | 0.228 | -0.021 | 0.42  | 59.2  | 0.432 | 0.452 |
| <i>FvF3H50</i> | 0.2937 | 0.3457 | 0.3052 | 0.3275 | 0.204 | 0.007  | 0.421 | 57.64 | 0.433 | 0.466 |
| <i>FvF3H51</i> | 0.375  | 0.2419 | 0.3413 | 0.3234 | 0.187 | -0.078 | 0.356 | 56.84 | 0.434 | 0.432 |
| <i>FvF3H52</i> | 0.375  | 0.2419 | 0.3413 | 0.3234 | 0.187 | -0.078 | 0.356 | 56.84 | 0.438 | 0.445 |
| <i>FvF3H53</i> | 0.3586 | 0.2759 | 0.2836 | 0.3583 | 0.168 | -0.108 | 0.347 | 57.01 | 0.439 | 0.438 |
| <i>FvF3H54</i> | 0.4178 | 0.2933 | 0.267  | 0.3016 | 0.206 | -0.042 | 0.386 | 55.85 | 0.44  | 0.45  |
| <i>FvF3H55</i> | 0.376  | 0.2727 | 0.4    | 0.2598 | 0.216 | -0.027 | 0.41  | 55.04 | 0.442 | 0.447 |
| <i>FvF3H56</i> | 0.3655 | 0.2517 | 0.3125 | 0.3413 | 0.216 | -0.034 | 0.394 | 55.02 | 0.443 | 0.452 |
| <i>FvF3H57</i> | 0.3686 | 0.2993 | 0.3401 | 0.2655 | 0.199 | 0.008  | 0.425 | 47.97 | 0.444 | 0.464 |
| <i>FvF3H58</i> | 0.4113 | 0.2908 | 0.3404 | 0.2548 | 0.215 | -0.021 | 0.404 | 57.49 | 0.444 | 0.433 |
| <i>FvF3H59</i> | 0.3891 | 0.2802 | 0.3745 | 0.276  | 0.207 | -0.041 | 0.393 | 56.94 | 0.446 | 0.449 |
| <i>FvF3H60</i> | 0.4053 | 0.2599 | 0.3692 | 0.2736 | 0.231 | -0.039 | 0.4   | 52.86 | 0.448 | 0.462 |
| <i>FvF3H61</i> | 0.2828 | 0.4631 | 0.2588 | 0.2991 | 0.244 | 0.035  | 0.443 | 58.49 | 0.448 | 0.44  |
| <i>FvF3H62</i> | 0.3448 | 0.2974 | 0.2864 | 0.3483 | 0.19  | -0.037 | 0.387 | 59.11 | 0.448 | 0.442 |
| <i>FvF3H63</i> | 0.339  | 0.2877 | 0.3007 | 0.3506 | 0.191 | -0.015 | 0.401 | 58.41 | 0.448 | 0.457 |
| <i>FvF3H64</i> | 0.386  | 0.3235 | 0.2869 | 0.2641 | 0.205 | 0      | 0.407 | 52.08 | 0.449 | 0.444 |
| <i>FvF3H65</i> | 0.3604 | 0.2968 | 0.3407 | 0.2749 | 0.18  | -0.116 | 0.348 | 56.76 | 0.45  | 0.451 |
| <i>FvF3H66</i> | 0.4055 | 0.2268 | 0.377  | 0.2684 | 0.177 | -0.105 | 0.352 | 53.82 | 0.451 | 0.459 |
| <i>FvF3H67</i> | 0.4488 | 0.2261 | 0.3452 | 0.2863 | 0.204 | -0.124 | 0.345 | 55.68 | 0.452 | 0.443 |
| <i>FvF3H68</i> | 0.4521 | 0.2226 | 0.3422 | 0.2713 | 0.211 | -0.054 | 0.379 | 52.33 | 0.452 | 0.474 |
| <i>FvF3H69</i> | 0.4539 | 0.2287 | 0.3561 | 0.243  | 0.218 | -0.067 | 0.372 | 55.81 | 0.453 | 0.453 |
| <i>FvF3H70</i> | 0.4203 | 0.2542 | 0.3371 | 0.2713 | 0.205 | -0.065 | 0.379 | 50.69 | 0.454 | 0.476 |
| <i>FvF3H71</i> | 0.4509 | 0.2589 | 0.3237 | 0.2618 | 0.229 | -0.034 | 0.402 | 55.27 | 0.454 | 0.464 |
| <i>FvF3H72</i> | 0.2889 | 0.294  | 0.3284 | 0.3414 | 0.174 | -0.076 | 0.366 | 55.74 | 0.454 | 0.453 |
| <i>FvF3H73</i> | 0.3787 | 0.2924 | 0.2817 | 0.3269 | 0.195 | -0.049 | 0.381 | 55.79 | 0.457 | 0.478 |
| <i>FvF3H74</i> | 0.3564 | 0.297  | 0.25   | 0.3552 | 0.201 | -0.007 | 0.401 | 56.15 | 0.459 | 0.487 |

|                 |        |        |        |        |       |        |       |       |       |       |
|-----------------|--------|--------|--------|--------|-------|--------|-------|-------|-------|-------|
| <i>FvF3H75</i>  | 0.3394 | 0.2996 | 0.3053 | 0.358  | 0.203 | -0.03  | 0.395 | 58.29 | 0.46  | 0.465 |
| <i>FvF3H76</i>  | 0.3738 | 0.267  | 0.2591 | 0.3591 | 0.199 | -0.068 | 0.372 | 58.87 | 0.461 | 0.489 |
| <i>FvF3H77</i>  | 0.3958 | 0.2473 | 0.3546 | 0.278  | 0.183 | -0.11  | 0.35  | 49.23 | 0.461 | 0.48  |
| <i>FvF3H78</i>  | 0.2386 | 0.4318 | 0.2355 | 0.3202 | 0.218 | 0.066  | 0.453 | 53.55 | 0.465 | 0.458 |
| <i>FvF3H79</i>  | 0.3925 | 0.317  | 0.3224 | 0.2743 | 0.208 | -0.022 | 0.401 | 50.69 | 0.466 | 0.455 |
| <i>FvF3H80</i>  | 0.1468 | 0.4642 | 0.1378 | 0.5019 | 0.224 | 0.11   | 0.473 | 48    | 0.466 | 0.473 |
| <i>FvF3H81</i>  | 0.3623 | 0.3188 | 0.3892 | 0.2093 | 0.197 | -0.07  | 0.373 | 52.08 | 0.469 | 0.463 |
| <i>FvF3H82</i>  | 0.2447 | 0.4716 | 0.2265 | 0.3559 | 0.243 | 0.076  | 0.462 | 52.68 | 0.469 | 0.459 |
| <i>FvF3H83</i>  | 0.3132 | 0.3843 | 0.3092 | 0.2675 | 0.2   | -0.044 | 0.383 | 53.77 | 0.469 | 0.459 |
| <i>FvF3H84</i>  | 0.5    | 0.212  | 0.3451 | 0.2311 | 0.238 | -0.061 | 0.374 | 51.72 | 0.471 | 0.453 |
| <i>FvF3H85</i>  | 0.3743 | 0.2696 | 0.2981 | 0.321  | 0.189 | -0.046 | 0.392 | 56.88 | 0.473 | 0.457 |
| <i>FvF3H86</i>  | 0.4519 | 0.251  | 0.3272 | 0.2563 | 0.212 | -0.05  | 0.39  | 54.24 | 0.473 | 0.46  |
| <i>FvF3H87</i>  | 0.3983 | 0.2554 | 0.3816 | 0.2371 | 0.185 | -0.121 | 0.344 | 56.28 | 0.48  | 0.47  |
| <i>FvF3H88</i>  | 0.4357 | 0.225  | 0.3583 | 0.2661 | 0.185 | -0.139 | 0.331 | 48.97 | 0.482 | 0.454 |
| <i>FvF3H89</i>  | 0.349  | 0.3255 | 0.3393 | 0.2464 | 0.193 | -0.078 | 0.371 | 57    | 0.485 | 0.491 |
| <i>FvF3H90</i>  | 0.3403 | 0.3681 | 0.3308 | 0.2489 | 0.211 | -0.051 | 0.393 | 56.61 | 0.486 | 0.466 |
| <i>FvF3H91</i>  | 0.3429 | 0.35   | 0.3532 | 0.2445 | 0.213 | -0.076 | 0.381 | 58.19 | 0.486 | 0.463 |
| <i>FvF3H92</i>  | 0.3227 | 0.3652 | 0.3529 | 0.2478 | 0.203 | -0.051 | 0.393 | 57.65 | 0.486 | 0.469 |
| <i>FvF3H93</i>  | 0.3227 | 0.3652 | 0.3529 | 0.2478 | 0.203 | -0.051 | 0.393 | 57.65 | 0.487 | 0.463 |
| <i>FvF3H94</i>  | 0.3147 | 0.3636 | 0.3676 | 0.2402 | 0.198 | -0.068 | 0.383 | 56.64 | 0.492 | 0.485 |
| <i>FvF3H95</i>  | 0.3603 | 0.3137 | 0.3423 | 0.2786 | 0.208 | -0.055 | 0.389 | 55.82 | 0.493 | 0.447 |
| <i>FvF3H96</i>  | 0.36   | 0.3455 | 0.3333 | 0.2456 | 0.192 | -0.085 | 0.372 | 59.02 | 0.493 | 0.466 |
| <i>FvF3H97</i>  | 0.2724 | 0.3586 | 0.3154 | 0.3465 | 0.211 | -0.039 | 0.398 | 60.95 | 0.494 | 0.466 |
| <i>FvF3H98</i>  | 0.2986 | 0.4173 | 0.2519 | 0.3061 | 0.247 | 0.068  | 0.46  | 55.1  | 0.496 | 0.479 |
| <i>FvF3H99</i>  | 0.3213 | 0.3935 | 0.2519 | 0.302  | 0.25  | 0.049  | 0.448 | 56.57 | 0.497 | 0.459 |
| <i>FvF3H100</i> | 0.375  | 0.2578 | 0.3636 | 0.2909 | 0.19  | -0.143 | 0.331 | 52.28 | 0.497 | 0.474 |



|                 |        |        |        |        |       |        |       |       |       |       |
|-----------------|--------|--------|--------|--------|-------|--------|-------|-------|-------|-------|
| <i>FvF3H101</i> | 0.3838 | 0.2362 | 0.3849 | 0.2863 | 0.218 | -0.053 | 0.388 | 52.95 | 0.506 | 0.472 |
| <i>FvF3H102</i> | 0.3838 | 0.2362 | 0.3849 | 0.2863 | 0.218 | -0.053 | 0.388 | 52.95 | 0.507 | 0.495 |
| <i>FvF3H103</i> | 0.44   | 0.1964 | 0.3258 | 0.3239 | 0.2   | -0.114 | 0.342 | 47.83 | 0.507 | 0.478 |
| <i>FvF3H104</i> | 0.3879 | 0.3034 | 0.3343 | 0.2446 | 0.195 | -0.025 | 0.394 | 56.9  | 0.512 | 0.469 |
| <i>FvF3H105</i> | 0.3287 | 0.3633 | 0.2473 | 0.3439 | 0.213 | 0      | 0.416 | 58.56 | 0.52  | 0.481 |
| <i>FvF3H106</i> | 0.3086 | 0.2037 | 0.354  | 0.4257 | 0.177 | -0.189 | 0.3   | 57.57 | 0.529 | 0.479 |
| <i>FvF3H107</i> | 0.3696 | 0.2879 | 0.3514 | 0.2712 | 0.205 | -0.022 | 0.398 | 52.41 | 0.535 | 0.481 |
| <i>FvF3H108</i> | 0.3772 | 0.2918 | 0.3442 | 0.2688 | 0.2   | -0.024 | 0.396 | 51.66 | 0.539 | 0.485 |
| <i>FvF3H109</i> | 0.4034 | 0.2899 | 0.35   | 0.2732 | 0.226 | -0.077 | 0.379 | 54.86 | 0.54  | 0.493 |
| <i>FvF3H110</i> | 0.3512 | 0.314  | 0.4017 | 0.2269 | 0.191 | -0.045 | 0.391 | 54.74 | 0.54  | 0.51  |
| <i>FvF3H111</i> | 0.3299 | 0.354  | 0.341  | 0.2301 | 0.207 | -0.017 | 0.402 | 57.68 | 0.549 | 0.504 |
| <i>FvF3H112</i> | 0.2136 | 0.4746 | 0.1741 | 0.3543 | 0.215 | 0.101  | 0.468 | 53.27 | 0.553 | 0.48  |
| <i>FvF3H113</i> | 0.2899 | 0.4454 | 0.2275 | 0.3607 | 0.264 | 0.004  | 0.427 | 55.24 | 0.559 | 0.491 |
| <i>FvF3H114</i> | 0.2787 | 0.4713 | 0.2566 | 0.2944 | 0.24  | 0.022  | 0.434 | 56.72 | 0.56  | 0.514 |
| <i>FvF3H115</i> | 0.3441 | 0.3151 | 0.3463 | 0.2594 | 0.197 | -0.011 | 0.411 | 55.68 | 0.576 | 0.508 |
| <i>FvF3H116</i> | 0.375  | 0.2875 | 0.3576 | 0.2734 | 0.182 | -0.103 | 0.348 | 52.51 | 0.579 | 0.49  |
| <i>FvF3H117</i> | 0.4615 | 0.2538 | 0.3421 | 0.2843 | 0.217 | -0.148 | 0.348 | 50.92 | 0.58  | 0.489 |
| <i>FvF3H118</i> | 0.3497 | 0.3366 | 0.3636 | 0.2348 | 0.212 | 0.049  | 0.448 | 54.48 | 0.586 | 0.494 |
| <i>FvF3H119</i> | 0.3607 | 0.3464 | 0.2568 | 0.3125 | 0.257 | 0.082  | 0.466 | 48.08 | 0.595 | 0.491 |
| <i>FvF3H120</i> | 0.4318 | 0.25   | 0.3347 | 0.2844 | 0.218 | -0.029 | 0.409 | 51.91 | 0.601 | 0.503 |
| <i>FvF3H121</i> | 0.3045 | 0.428  | 0.2743 | 0.2963 | 0.232 | 0.025  | 0.441 | 57.17 | 0.603 | 0.495 |
| <i>FvF3H122</i> | 0.2711 | 0.4437 | 0.2661 | 0.3022 | 0.235 | 0.108  | 0.478 | 54.98 | 0.609 | 0.526 |
| <i>FvF3H123</i> | 0.2534 | 0.4041 | 0.318  | 0.3253 | 0.205 | 0.039  | 0.447 | 53.06 | 0.626 | 0.512 |
| <i>FvF3H124</i> | 0.3471 | 0.2955 | 0.3247 | 0.311  | 0.2   | -0.042 | 0.395 | 55.78 | 0.654 | 0.539 |
| <i>FvF3H125</i> | 0.3355 | 0.3094 | 0.3133 | 0.337  | 0.174 | -0.037 | 0.391 | 58.07 | 0.676 | 0.584 |
| <i>FvF3H126</i> | 0.3545 | 0.3284 | 0.2642 | 0.3493 | 0.206 | -0.074 | 0.372 | 61    | 0.766 | 0.597 |

**Supplementary Table S4.** Primer sequences of *FvF3H* gene family used for qRT-PCR

| name            | Forward primer(5'-3')     | Reverse primer (5'-3')     |
|-----------------|---------------------------|----------------------------|
| <i>FvF3H4</i>   | GGTGTCCAAGAGCCGATAAGGTG   | TGTCCTGCAACAGAACAGTCATTCC  |
| <i>FvF3H6</i>   | TGGTCTCCTCATCCCTTCCTCAATC | TCTGTTTCTCTTCCACTGGCATAGC  |
| <i>FvF3H7</i>   | AGCAACTCGCTGAAGGTGAACTAC  | CTGATTGAGGAAGGTGTGAGGAGAC  |
| <i>FvF3H10</i>  | AGGAAGGGATCGGCTGGATGTC    | CGCACGGTGAATTGTAGTCTTGAAC  |
| <i>FvF3H12</i>  | TTGGCAACCGATGATGTCTTAGGC  | CGTAGGCAGGCACTCCACAAG      |
| <i>FvF3H13</i>  | TCCACCATCCAAGAACAACACCATC | ACCTTCCATTACTCAGCACCTCCAG  |
| <i>FvF3H15</i>  | ATGTCCAGGCACTCTCATTGTCAAC | CTGCGACTGCTTCACCCCTTTGG    |
| <i>FvF3H16</i>  | GAGAAGGAGGCATTGACGAAGGC   | GTGTGGCGTTTGAGTCCGAGAG     |
| <i>FvF3H19</i>  | GAGTGTTGGACGAGATGCTGGAG   | TCAGGCTCAGGACATGGAGGATAG   |
| <i>FvF3H23</i>  | TCGGGACTGGAAGGAGGTGTTTG   | TGGAGATGGGCAAGGCGGATAG     |
| <i>FvF3H27</i>  | TGCGAGGACTTTGGCTTCTTCTATC | TAGTAGGACAGTGGTGCTCAGGATG  |
| <i>FvF3H30</i>  | TTAAGCGGTATCTGGAGGAGGTGAG | ATGGCGGATAGTGATTTGACAGCAG  |
| <i>FvF3H32</i>  | AGCCTGTCCCTAATGCCTTGGTAG  | AAGGATGGATGAAGCTCGCAACTG   |
| <i>FvF3H34</i>  | AGTGACCAAAGTGCCAAAGTTCCTC | TGTTTCCGATGCTTCACGAATCTCC  |
| <i>FvF3H40</i>  | GCAGAGCAACTAATTCGCATCGTC  | TCGGTTCGGGAGTGGAGTATGG     |
| <i>FvF3H44</i>  | CCGCACACTGACACCTCCATTG    | ACCACCACACGATGAAGAACTG     |
| <i>FvF3H53</i>  | CGGAGACACCAGCATTGTTCAAGAG | GGAGCCATTGCCATCCTCATCAC    |
| <i>FvF3H54</i>  | TGGCACAGGCAAACACTCAGATG   | TTACAGATCCAGGCACAGGAACAAC  |
| <i>FvF3H58</i>  | TTACGCCTCATTGAGATGCCTCAG  | ACGCTTCAGGAAGTGGCTTAACAG   |
| <i>FvF3H62</i>  | GCCGAGAGTTTAAGAGACCAAGACC | CCTGCATCGACGATCCCTTTTAC    |
| <i>FvF3H63</i>  | CCCGCAGCCTGAATTGACCATC    | TGGAAGAAGCAACCCACAGAACTC   |
| <i>FvF3H66</i>  | GAGTCTCTTGGGCTAAAGCGAAGTC | TTGTGGGCAAGCAGGATAGTAATGG  |
| <i>FvF3H67</i>  | CCAGCAGTCCAGTCATCTACAACAG | GCCCAAGAGCCTCAGACAACAAC    |
| <i>FvF3H69</i>  | TCCACAGCCAGAACTGACTCTAGG  | CGGGCACAGGAGGTACATCAAAC    |
| <i>FvF3H70</i>  | GCGGCTTCCTCACTGTCCCTTC    | CCTGTGCTCTACACTCCTGAATCTG  |
| <i>FvF3H73</i>  | CAGGCGGTTTCAGTATCCCAGTG   | TGACCTTCCTCACCATATCCCTACC  |
| <i>FvF3H79</i>  | CACTCGGACTGGCTGTTCATACTG  | GCCCTTCACTCCCTCTGTTTGC     |
| <i>FvF3H80</i>  | GCGGCGTGGAACAAGGAGATC     | GGCAGGGCGGGTAGTAGTGTC      |
| <i>FvF3H82</i>  | GCACTCACCTTCATCCTCCACAAC  | TCTTCTCCTTGGGCGGCTCAC      |
| <i>FvF3H87</i>  | GCGAGTTCATGAGCAGGATAGTG   | AGCCGAGTGTGTCTCTCCAGTC     |
| <i>FvF3H88</i>  | GTCTGCGAGGACATGGTGAGTG    | TTGTGGTGACTGGAGCAACTGTAAG  |
| <i>FvF3H89</i>  | CGCCTTGTCCACAGCCTGAAC     | GCCATTTCCCATTTGTGCTCAACTTG |
| <i>FvF3H92</i>  | AGAAGAAGCCGAGAAGTAGCATTGG | TGAGGAGAGTGACTAGACCGTGATC  |
| <i>FvF3H94</i>  | ACTTCTTCAAGGTCCGAACACATCC | GGCTGAGGACAAGGAGGGTAGTAG   |
| <i>FvF3H97</i>  | CGGAGGAGATGAAGGTGGAGGAG   | TGGTTGCGGACAGTAGGGATAGC    |
| <i>FvF3H103</i> | CGGACACGAGCACCATAACCATAC  | CACAACAAGAGCATCTGGAATTGGC  |
| <i>FvF3H104</i> | AACTTCATCTTCTCGTGGTGCTTGG | ACTGGAGGACTCTTGACTGGTTCC   |
| <i>FvF3H110</i> | ATGAGAGCGTGGGTATTGATGAAGC | TCGCAGCAGGTAGTTCGTTGAC     |
| <i>FvF3H112</i> | GCCTCACCTTCTTCAACGACTCC   | GCAACCACCCGCCGATATTCC      |
| <i>FvF3H120</i> | TGCCAATGCCAGAATCACATCACTC | AGGCTTCAGAAAGAGAGGGCAAATC  |
| <i>FvF3H123</i> | GAAGCCACCGAGGGAGTTGATTG   | TGTTCTTGAAGCCAGTTCGTGAAGG  |

---

|                 |                           |                        |
|-----------------|---------------------------|------------------------|
| <i>FvF3H126</i> | GCACTTACCATTCTCCTCCAAGACC | CGGGCTAATCAGGGCATCATCC |
| <i>FvGAPDH</i>  | CATTCATCACCACCGACTACA     | GAAGGGTCTTCTCATCCTTGAC |

---
